# Supplementary material
Source: PubMed Central journal article supplement (PMC3232609)
Supplement: supp_jc.2011-1497_11-1497_suppfiles_2fig5tab.pdf [file supp_jc.2011-1497_11-1497_suppfiles_2fig5tab.pdf]

## Online Appendix

Supplementary Figure S1: Histograms and density plots of  $\log_{10}$ -transformed interleukin levels.

(A) IL-1RA, (B) Low IL-1RA, (C) High IL1RA, (D) IL-6, E

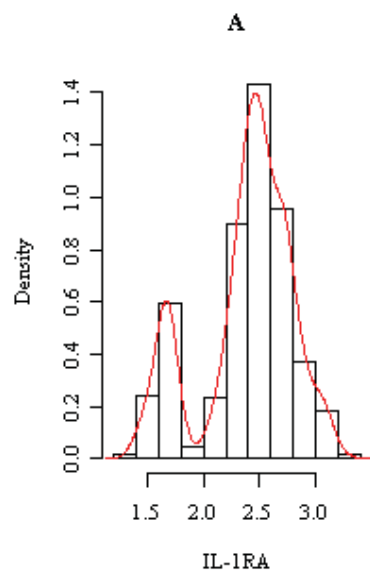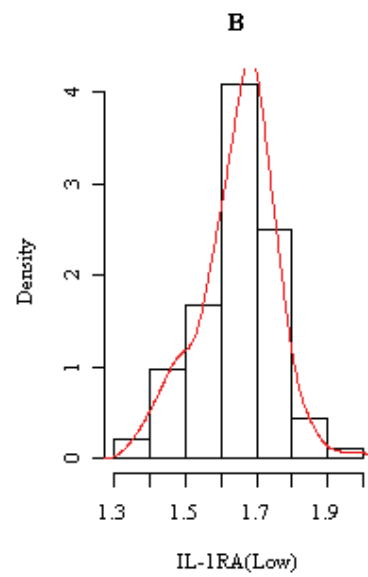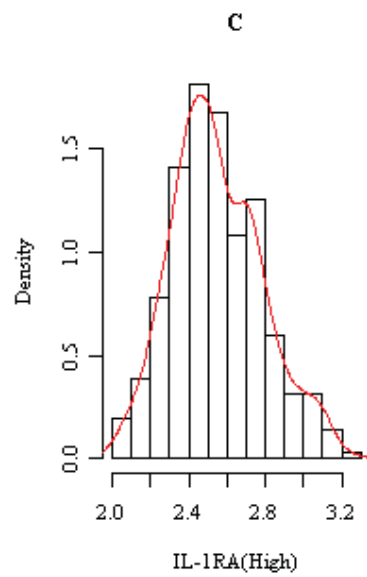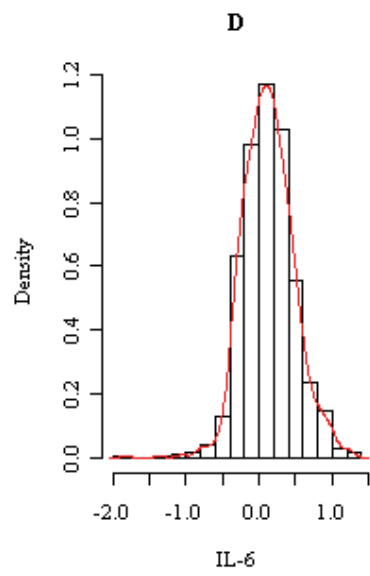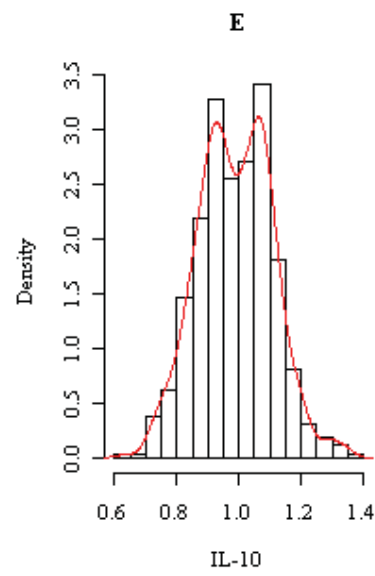

## Figure 2 Legend

Figure 2 Scatter plots and regression lines of HOMA-IR on interleukins. (A) IL-1RA, (B) Low IL-1RA, (C) High IL-1RA, (D) IL-6, and (E) IL-10. The red line is the fitted regression line of  $\log_{10}$ -transformed values of HOMA-IR and interleukins.

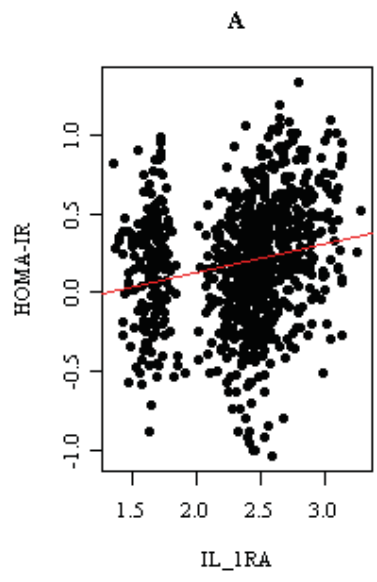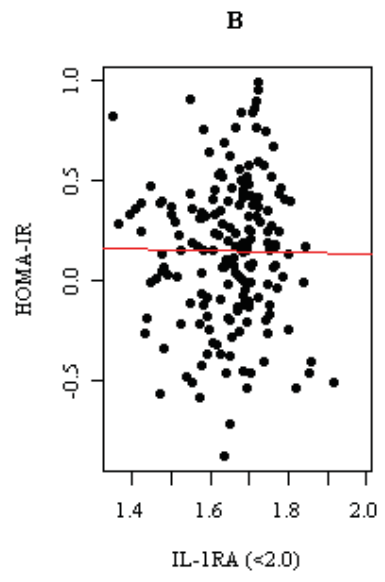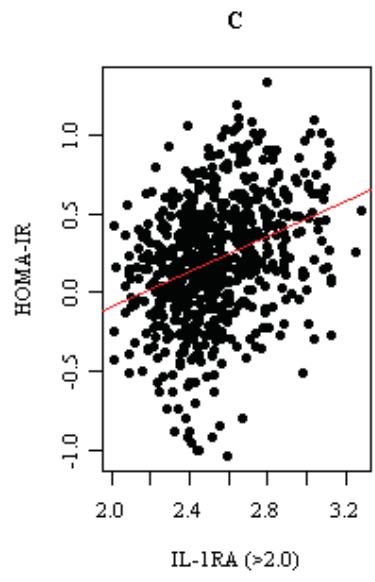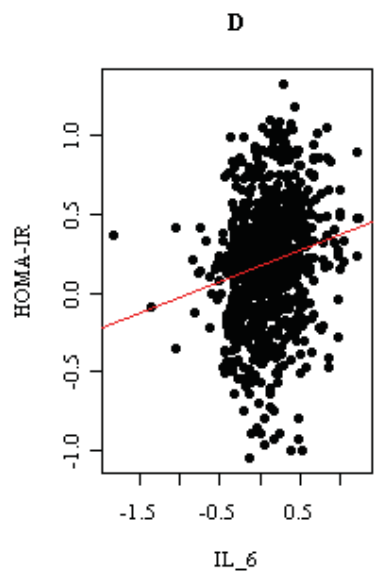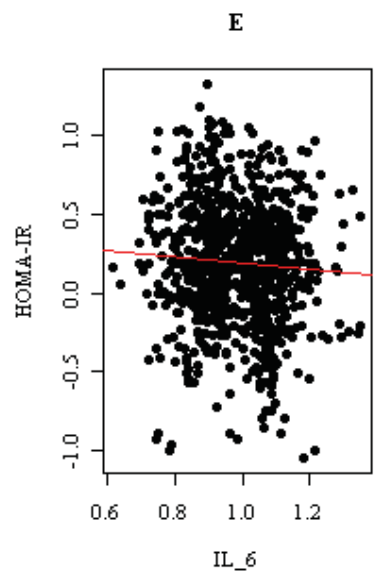

Supplementary Table S1: Association between interleukins and measures of obesity adjusted for age and sex

| Interleukins*<br>(n=1020) | Measure of Obesity | $\beta$ (SE)     | P-value | Adjusted R <sup>2</sup> |
|---------------------------|--------------------|------------------|---------|-------------------------|
| IL-6                      |                    |                  |         |                         |
|                           | Obese              | 0.177 (0.022)    | <0.001  | 0.109                   |
|                           | BMI                | 0.782 (0.097)    | <0.001  | 0.109                   |
|                           | WC                 | 1.303 (0.140)    | <0.001  | 0.127                   |
|                           | HC                 | 1.256 (0.187)    | <0.001  | 0.092                   |
|                           | WHR                | 1.260 (0.154)    | <0.001  | 0.108                   |
|                           | PFM§               | 0.008 (0.001)    | <0.001  | 0.089                   |
| IL-1RA                    |                    |                  |         |                         |
|                           | Obese              | 0.222 (0.026)    | <0.001  | 0.081                   |
|                           | BMI                | 0.949 (0.116)    | <0.001  | 0.075                   |
|                           | WC                 | 1.360 (0.170)    | <0.001  | 0.073                   |
|                           | HC                 | 1.246 (0.225)    | <0.001  | 0.042                   |
|                           | WHR                | 1.286 (0.186)    | <0.001  | 0.057                   |
|                           | PFM                | 0.009 (0.001)    | <0.001  | 0.049                   |
| IL-10                     |                    |                  |         |                         |
|                           | Obese              | -0.010 (0.008)   | 0.199   | 0.006                   |
|                           | BMI                | -0.032 (0.036)   | 0.374   | 0.006                   |
|                           | WC                 | 0.010 (0.052)    | 0.845   | 0.005                   |
|                           | HC                 | -0.040 (0.068)   | 0.555   | 0.005                   |
|                           | WHR                | 0.066 (0.056)    | 0.238   | 0.006                   |
|                           | PFM                | <0.001 (<0.0001) | 0.927   | 0.004                   |

\*Each model represents regression of an interleukin on a measure of obesity.

WC – Waist circumference; HC – Hip circumference; WHR – waist-to-hip ratio; PFM – percent fat mass

Supplementary Table S2: Characteristics of African American participants grouped by low vs. high IL-1RA levels

| <b>Variable</b>          | <b>Low IL-1RA*</b><br>(Mean (SD) or Percent) | <b>High IL-1RA†</b><br>(Mean (SD) or Percent) | <b>P-value</b>        |
|--------------------------|----------------------------------------------|-----------------------------------------------|-----------------------|
| Age (yrs)                | 42.11 (11.07)                                | 43.41 (10.79)                                 | 0.147                 |
| BMI (kg/m <sup>2</sup> ) | 27.65 (1.28)                                 | 28.78 (1.28)                                  | 0.052                 |
| Obese                    | 30.4%                                        | 41.8%                                         | 0.003                 |
| WC (cm)                  | 89.97 (1.18)                                 | 92.53 (1.18)                                  | 0.042                 |
| HC (cm)                  | 107.07 (1.14)                                | 107.49 (1.14)                                 | 0.718                 |
| WHR                      | 0.844 (0.072)                                | 0.862 (0.074)                                 | 0.002                 |
| PFM¶                     | 34.30 (10.77)                                | 35.32 (10.90)                                 | 0.250                 |
| Sex (Female)             | 53.26%                                       | 55.76%                                        | 0.703                 |
| Fasting Glucose (mg/dl)  | 85.77 (9.19)                                 | 84.52 (11.01)                                 | 0.116                 |
| Fasting Insulin (μU/ml)  | 6.41 (2.33)                                  | 7.51 (2.54)                                   | 0.030                 |
| HOMA-IR                  | 1.40 (2.33)                                  | 1.60 (2.46)                                   | 0.051                 |
| IL-6 (pg/ml)             | 1.01 (2.36)                                  | 1.42 (2.17)                                   | 1.24×10 <sup>-6</sup> |
| IL-10 (pg/ml)            | 9.12 (1.26)                                  | 9.87 (1.33)                                   | 7.92×10 <sup>-5</sup> |

\* IL-1RA < 100 pg/ml (*n* = 183).

† IL-1RA > 100 pg/ml (*n* = 835).

WC – Waist circumference; HC – Hip circumference; WHR – waist-to-hip ratio; PFM – percent fat mass;

(Female) refers to proportion female



Supplementary Table S3: Association between stratified IL-1RA and obesity adjusted for age and sex

| <b>IL-1RA*</b> | <b>Measure of Obesity</b> | <b><math>\beta</math> (SE)</b> | <b><i>P</i>-value</b> | <b>Adjusted R<sup>2</sup></b> |
|----------------|---------------------------|--------------------------------|-----------------------|-------------------------------|
| Low            |                           |                                |                       |                               |
|                | Obesity                   | 0.026 (0.018)                  | 0.134                 | 0.002                         |
|                | BMI                       | 0.077 (0.075)                  | 0.307                 | -0.005                        |
|                | WC                        | 0.073 (0.111)                  | 0.510                 | -0.008                        |
|                | HC                        | 0.083 (0.144)                  | 0.564                 | -0.009                        |
|                | WHR                       | 0.066 (0.128)                  | 0.610                 | -0.009                        |
|                | PFM                       | <0.001 (<0.001)                | 0.749                 | -0.010                        |
| High           |                           |                                |                       |                               |
|                | Obesity                   | 0.186 (0.015)                  | <0.001                | 0.177                         |
|                | BMI                       | 0.912 (0.069)                  | <0.001                | 0.201                         |
|                | WC                        | 1.30 (0.101)                   | <0.001                | 0.193                         |
|                | HC                        | 1.42 (0.136)                   | <0.001                | 0.147                         |
|                | WHR                       | 0.917 (0.116)                  | <0.001                | 0.099                         |
|                | PFM                       | 0.009 (<0.001)                 | <0.001                | 0.148                         |

\*Each model represents regression of a grouping of IL-1RA on a measure of obesity.

WC – Waist circumference; HC – Hip circumference; WHR – waist-to-hip ratio; PFM – percent fat mass

Supplementary Table S4: Model fitting of HOMA-IR regressed on interleukins given measures of obesity

| <b>Base Predictor*</b> | <b>IL-6</b> | <b>IL-10</b> | <b>IL-1RA</b> | <b>IL-1RA Low</b> | <b>IL-1RA High</b> |
|------------------------|-------------|--------------|---------------|-------------------|--------------------|
| Obese                  | 0.181       | 0.212        | 0.142         | 0.697             | 0.041              |
| BMI                    | 0.266       | 0.190        | 0.262         | 0.733             | 0.122              |
| WC                     | 0.266       | 0.182        | 0.262         | 0.787             | 0.098              |
| HC                     | 0.198       | 0.168        | 0.120         | 0.810             | 0.042              |
| WHR                    | 0.074       | 0.136        | 0.061         | 0.861             | 0.005              |
| PFM                    | 0.174       | 0.142        | 0.087         | 0.857             | 0.025              |

\*Each model represents regression of HOMA-IR on an interleukin given a listed measure of obesity.

WC – Waist circumference; HC – Hip circumference; WHR – waist-to-hip ratio; PFM – percent fat mass

Shown are likelihood ratio test  $p$ -values for the null vs. the alternative model with HOMA-IR regressed on the measure of obesity without (under the null) or with (under the alternative) the interleukin.

Supplementary Table S5: Model fitting of HOMA-IR regressed on measures of obesity given interleukins

| <b>Base Predictor</b> | <b>Obese</b> | <b>BMI</b> | <b>WC</b> | <b>HC</b> | <b>WHR</b> | <b>PFM</b> |
|-----------------------|--------------|------------|-----------|-----------|------------|------------|
| IL-6                  | <0.001       | <0.001     | <0.001    | <0.001    | 0.002      | <0.001     |
| IL-10                 | <0.001       | <0.001     | <0.001    | <0.001    | <0.001     | <0.001     |
| IL-1RA                | <0.001       | <0.001     | <0.001    | <0.001    | 0.003      | <0.001     |
| IL-1RA Low            | 0.014        | 0.004      | 0.005     | 0.008     | 0.100      | 0.016      |
| IL-1RA High           | 0.005        | <0.001     | <0.001    | 0.002     | 0.044      | 0.001      |

\* Shown are likelihood ratio test *p*-values for the null *vs.* the alternative model with HOMA-IR regressed on an interleukin without (under the null) or with (under the alternative) the listed measure of obesity.

IL-1RA < 100 (*n* = 183).

IL-1RA > 100 (*n* = 835).
